# Supplementary material
Source: Springer Nature journal article supplement (https://www.springermedizin.de/resource/supplementary/12865_2013_580_MOESM12_ESM.pdf/9428280)

# BRAA Levels of Monoclonals

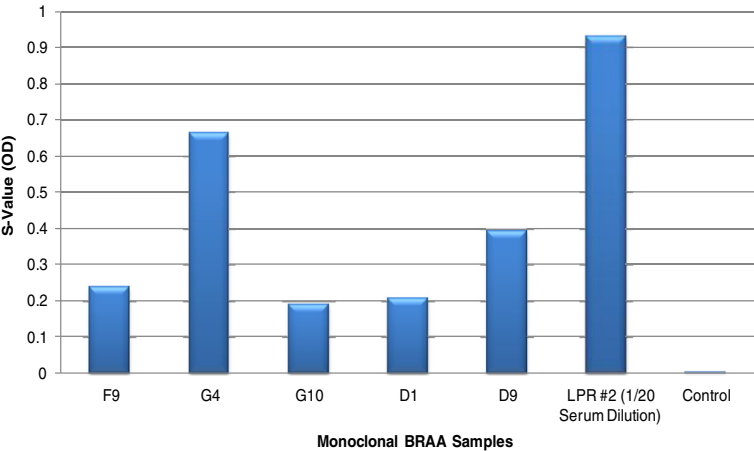

Supplement: MOESM12 [file 9428280]
